# Supplementary material
Source: Springer Nature journal article supplement (https://www.springermedizin.de/resource/supplementary/12888_2009_663_MOESM7_ESM.pdf/9478092)

**Subgroup within study****Study name****Statistics for each study****Events / Total****Odds ratio and 95% CI**

|            |                              | <b>Odds ratio</b> | <b>Lower limit</b> | <b>Upper limit</b> | <b>Black</b> | <b>White</b> |
|------------|------------------------------|-------------------|--------------------|--------------------|--------------|--------------|
| Non-secure | Compton, 2000 <sup>2</sup>   | 0.855             | 0.578              | 1.265              | 109 / 258    | 77 / 167     |
| Non-secure | Castaneda, 1985 <sup>3</sup> | 0.613             | 0.368              | 1.023              | 25 / 558     | 41 / 577     |
| Non-secure |                              | 0.755             | 0.551              | 1.035              |              |              |
| Secure     | Coid, 2000 <sup>4</sup>      | 0.217             | 0.151              | 0.313              | 33 / 628     | 452 / 2224   |
| Secure     | Maden, 1999 <sup>1</sup>     | 0.221             | 0.088              | 0.558              | 6 / 100      | 28 / 125     |
| Secure     | Coid, 1999 <sup>5</sup>      | 0.209             | 0.145              | 0.301              | 33 / 648     | 470 / 2303   |
| Secure     |                              | 0.214             | 0.167              | 0.274              |              |              |

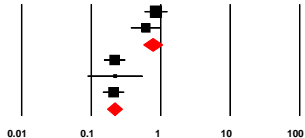

Supplement: MOESM7 [file 9478092]
